# Supplementary material for: Bioinformatics Analysis Identified Key Molecular Changes in Bladder Cancer Development and Recurrence
Source: Biomed Res Int. 2019 Nov 16;2019:3917982. doi: 10.1155/2019/3917982 (PMC6881748; doi:10.1155/2019/3917982)
Supplement: Supplementary Materials — Supplement figure 1: overall survival analysis for 20 hub genes from cluster SC (surrounding tissue vs. cancer tissue) (A: CDK1; B. CCNB1; C: CDC20; D: CCNA2; E: AURKB; F: EZH2; G: KIF2C; H: AURKA; I: TOP2A; J: BUB1B; K: BUB1; L: CCNB2; M: CDCA8; N: KIF20A; O: TPX2; P: CDC45; Q: FOXM1; R: KIF4A; S: ASPM; T: NDC80). None of the hub genes showed statistical significance in comparing overall survival for high and low expression. Supplement figure 2: disease-free survival analysis for 20 hub genes from cluster CR (cancer tissue vs. recurrent tissue) (A: CCNB1; B: JUN; C: CCNB2; D: ESPL1; E: RHOA; F: CDC45; G: MKI67; H: CDK4; I: AR; J: CDT1; K: FANCI; L: PRC1; M: MCM10; N: CDC25A; O: ASF1B; P: CDK6; Q: BLM; R: CENPM; S: CDKN1A; T: CCR7). Only (P) CDK6 (HR = 1.4, p = 0.015) showed statistical significance that higher expression patients indicated poor disease-free survival. Supplement figure 3: the expressions of (A) JUN and (B) CDK6 were not significantly different between BC and normal tissues (p = 0.639 and 0.466). Supplement Table 1: Cox regression for hub genes in bladder cancer and clinical info. [file 3917982.f1.zip › 3917982.f1/GSE13507_clinical_info( patient's clinical data).xls]

## Sheet: Clinical.Info
Sample name	SEX	AGE	invasiveness	Intravesical therapy	systemic chemo	TMN stage	Grade	Classifier.recurrence	Classifier.progression (non-muscle invasive)	Classifier.progression (muscle invasive)	classifier.cancer specific survival	classifier.overall survival	recurrence	progression	overall survival	cancer-specific survival	survivalMonth
BT001	M	78	1	2	1	T1N0M0	1	2	1				2	1	2	1	18.1667
BT002	F	54	1	1	1	TaN0M0	1	1	1				1	1	1	1	136.967
BT003	M	37	1	1	1	TaN0M0	1	2	1				1	1	1	1	136.367
BT004	M	72	1	2	1	T1N0M0	1	1	1				1	1	2	1	26.9
BT005	M	68	1	1	1	T1N0M0	1	2	2				1	1	2	1	87.0667
BT006	M	80	1	1	1	T1N0M0	1	1	2				1	1	2	1	15.3
BT007	M	67	1	2	1	T1N0M0	1	2	2				2	2	2	2	18.5333
BT008	M	58	2		2	T2N0M0	1			1	1	1		1	1	1	129.933
BT009	F	77	2		1	T3bN0M0	2			2	2	2		1	2	2	12.5667
BT010	M	64	2		2	T3aN0M0	1			2	1	1		1	1	1	128.967
BT011	M	63	1	1	1	TaN0M0	1	1	1				1	1	1	1	125.033
BT012	F	56	1	1	1	TaN0M0	1	1	1				1	1	1	1	125.267
BT013	M	69	1	1	1	T1N0M0	1	1	1				1	1	1	1	130.6
BT014	M	75	2		2	T4N0M0	1			2	2	2		1	2	2	1.03333
BT015	M	76	1	2	1	T1N0M0	1	1	1				1	1	1	1	129.667
BT016	M	61	2		2	T3aN2M1	1			1	2	2		1	2	2	16.6667
BT017	M	45	1	2	1	T1N0M0	1	2	1				2	1	1	1	127.633
BT018	M	58	1	1	1	TaN0M0	1	1	2				2	2	1	1	124.533
BT019	F	71	2		1	T4N2M1	2			2	2	2		1	2	2	3.13333
BT020	M	79	1	1	1	T1N0M0	1	1	1				1	1	2	1	65.9333
BT021	M	75	1	1	1	T1N0M0	1	1	1				1	1	2	1	3.23333
BT022	M	63	1	1	1	T1N0M0	1	2	1				1	1	1	1	120.6
BT023	F	68	1	2	1	T1N0M0	1	2	2				2	1	2	1	22.6667
BT024	M	56	2		2	T3aN0M0	2			2	1	1		2	1	1	120.5
BT025	M	82	1	1	1	T1N0M0	1	1	1				1	1	2	1	50.4333
BT026	M	38	2		2	T2N0M0	1			2	2	2		2	2	2	66.3
BT027	M	55	1	1	1	TaN0M0	1	2	1				1	1	1	1	120.167
BT028	M	53	1	2	1	T1N0M0	1	2	1				2	1	1	1	120.6
BT029	M	64	2		2	T3bN0M0	2			2	2	2		2	2	2	14.5667
BT030	M	68	2		2	T3aN0M0	2			1	1	1		1	1	1	115.833
BT031	M	65	1	1	1	TaN0M0	1	2	1				2	1	1	1	106.6
BT032	F	65	2		2	T2N0M0	2			1	1	1		1	1	1	121.2
BT033	M	74	1	1	1	T1N0M0	1	1	1				1	1	2	1	98
BT034	M	67	1	2	1	T1N0M0	1	2	2				2	2	2	2	67.0333
BT035	M	61	1	1	1	TaN0M0	1	1	1				1	1	1	1	99.7333
BT036	M	78	1	2	1	TaN0M0	1	1	2				2	2	2	1	50.3
BT037	M	52	1	1	1	T1N0M0	2	2	2				1	1	1	1	98.2333
BT038	M	65	1	2	1	T1N0M0	1	2	1				2	1	1	1	106.033
BT039	M	69	1	2	1	T1N0M0	1	1	1				1	1	1	1	95.3
BT040	M	64	1	1	1	TaN0M0	1	1	1				1	1	2	1	80.4333
BT041	M	69	1	2	2	T1N0M0	2	2	2				2	2	2	1	35.7
BT042	F	75	1	2	1	T1N0M0	2	2	2				2	1	2	1	51.7667
BT043	M	53	1	1	1	T1N0M0	1	2	1				1	1	1	1	92.8333
BT044	M	58	2		1	T2N0M0	1			1	1	1		1	1	1	90.7333
BT045	M	35	1	1	1	T1N0M0	1	1	1				1	1	1	1	90.4667
BT046	M	43	1	2	1	T1N0M0	1	1	1				1	1	1	1	86.0667
BT047	M	66	1	2	1	T1N0M0	1	2	2				2	2	2	1	134.967
BT048	M	83	1	1	1	T1N0M0	1	1	1				2	1	2	1	65.9333
BT049	M	73	2		1	T3bN0M0	2			2	2	2		2	2	2	25.8333
BT050	M	51	2		2	T3bN2M0	2			1	2	2		1	2	2	10.2667
BT051	F	88	1	2	1	T1N0M0	2	2	2				1	1	2	1	85.4333
BT052	M	77	1	1	1	T1N0M0	2	1	2				1	1	2	1	3.16667
BT053	M	79	1	2	1	T1N0M0	1	2	1				2	1	1	1	83.6333
BT054	M	79	1	1	1	T1N0M0	1	1	1				1	1	1	1	83.6333
BT055	M	63	1	2	1	T1N0M0	1	1	2				1	1	2	1	70.9333
BT056	M	62	2		1	T2N0M0	1			1	1	1		1	1	1	81.6333
BT057	M	67	1	1	1	T1N0M0	1	2	1				2	1	1	1	80.2
BT058	M	73	1	1	1	T1N0M0	2	2	2				2	2	1	1	78.8333
BT059	M	79	1	2	1	T1N0M0	2	2	2				1	1	1	1	78.7333
BT060	M	59	1	2	1	TaN0M0	1	2	2				2	2	2	1	70.7333
BT061	M	78	2		1	T2N1M1	2			2	2	2		1	2	2	8.7
BT062	M	59	1	2	1	T1N0M0	1	2	2				2	2	1	1	75.3333
BT063	F	38	1	2	1	T1N0M0	1	1	1				2	1	1	1	75.7
BT064	M	49	1	1	1	TaN0M0	1	1	1				1	1	1	1	75.1333
BT065	M	62	1	1	1	T1N0M0	1	2	2				2	1	1	1	75.1333
BT066	M	61	1	1	1	TaN0M0	1	1	1				1	1	1	1	74.1667
BT067	M	74	1	2	1	T1N0M0	2	2	2				2	1	2	1	16.2333
BT068	M	72	2		1	T3bN0M0	2			2	2	2		2	2	2	15.1
BT069	F	60	2		2	T2N0M0	1			2	2	2		2	2	2	11.2333
BT070	M	60	2		1	T2N0M0	2			1	1	1		1	1	1	69.4333
BT071	M	82	1	1	1	T1N0M0	2	2	2				2	1	2	1	25.0333
BT072	M	67	1	1	1	TaN0M0	1	1	2				1	1	1	1	67.0667
BT073	M	64	2		1	T2N0M0	2			1	1	1		1	1	1	65.2333
BT074	M	73	2		1	T4N0M0	2			1	2	2		1	2	2	11.9667
BT075	M	67	1	2	1	T1N0M0	1	1	2				1	1	1	1	62
BT076	M	77	1	1	1	T1N0M0	1	2	2				1	1	1	1	61.3333
BT077	M	66	1	1	1	T1N0M0	2	1	2				1	1	1	1	60.9
BT078	M	79	1	2	1	T1N0M0	1	2	2				1	1	1	1	60.2
BT079	M	48	1	2	1	T1N0M0	1	1	2				1	1	1	1	59.6
BT080	M	76	2		2	T4N0M0	2			2	2	2		2	2	2	10.4
BT081	M	66	1	1	1	T1N0M0	1	2	1				1	1	2	1	59.8667
BT082	M	67	1	2	1	T1N0M0	1	1	1				2	1	1	1	59
BT083	F	68	1	2	1	T1N0M0	1	2	2				2	1	1	1	58.7333
BT084	M	67	1	2	1	T1N0M0	1	1	1				1	1	2	1	46.1667
BT085	F	80	1	2	1	T1N0M0	1	1	1				1	1	1	1	58.4333
BT086	M	68	1	1	1	T1N0M0	1	2	2				1	1	1	1	58.0667
BT087	F	32	1	2	1	T1N0M0	1	2	1				2	1	1	1	57.6333
BT088	M	63	1	1	1	T1N0M0	1	1	1				1	1	2	1	36.3
BT089	F	80	2		1	T2N0M0	2			1	2	1		1	1	1	56.4667
BT090	M	67	2		1	T2N0M0	2			1	1	1		1	1	1	55.5
BT091	M	37	1	1	1	T1N0M0	1	1	1				1	1	1	1	52.9667
BT092	M	71	2		1	T3N1M0	2			2	2	2		2	2	2	11.5
BT093	M	60	2		1	T3N0M0	2			2	2	2		2	2	1	17.8667
BT094	M	74	1	2	1	T1N0M0	2	2	2				2	2	2	1	28.5333
BT095	M	80	1	1	1	T1N0M0	1	1	2				2	2	2	2	17.6333
BT096	M	85	2		1	T2N0M0	2			2	2	2		2	2	2	15.4
BT097	F	59	2		2	T3bN0M0	2			2	2	1		1	1	1	48.4333
BT098	F	65	2		2	T4N1M1	1			2	2	2		1	2	2	4.5
BT099	M	57	1	2	1	TaN0M0	1	1	1				2	1	1	1	47.5
BT100	M	73	2		1	T2N1M0	2			2	2	1		1	2	2	5.23333
BT101	M	66	2		2	T3bN0M0	2			1	1	1		1	1	1	45.6
BT102	M	66	2		1	T2N0M0	2			2	2	2		1	1	1	45.1333
BT103	M	64	1	2	1	TaN0M0	1	1	1				2	1	1	1	43.5
BT104	M	68	1	2	1	T1N0M0	2	1	2				1	1	1	1	44.1
BT105	F	59	2		1	T2N0M0	1			1	1	2		1	2	1	5.93333
BT106	M	66	1	1	1	T1N0M0	2	1	2				1	1	2	1	31.5333
BT107	F	63	1	2	1	T1N0M0	1	2	2				1	1	1	1	41.8
BT108	M	79	2		1	T2N2M0	2			1	2	2		1	2	2	6.5
BT109	M	44	1	2	1	T1N0M0	1	2	2				2	1	1	1	41.0667
BT110	M	66	2		1	T2bN0M0	2			1	1	1		1	1	1	39.7667
BT111	M	61	2		1	T2N0M0	1			2	1	1		1	1	1	38.9667
BT113	F	80	1	2	1	T1N0M0	1	2	2				1	1	2	1	31.9667
BT114	M	57	1	2	1	T1N0M0	1	1	1				1	1	1	1	37.3
BT115	M	55	2		2	T2aN0M0	1			1	1	1		1	1	1	36.8333
BT116	M	52	1	2	1	T1N0M0	1	1	1				1	1	1	1	36.5667
BT117	M	50	2		1	T2aN0M0	2			1	1	1		2	1	1	28.1
BT118	M	78	2		1	T2N0M0	2			2	2	2		2	2	2	3.93333
BT119	F	71	1	2	1	T1N0M0	1	1	2				1	1	2	1	23.5333
BT120	F	81	2		1	T3N0M0	2			2	2	2		2	2	2	15.1
BT121	M	43	1	2	1	TaN0M0	1	1	1				1	1	1	1	34.8667
BT122	M	80	2		1	T3N1M0	2			1	1	1		1	1	1	34.2333
BT123	M	47	1	1	1	TaN0M0	1	1	1				1	1	1	1	33.7
BT124	M	71	2		2	T4aN0M0	1			2	2	2		2	2	2	11.0667
BT125	F	73	2		1	T3N0M0	2			2	2	2		2	2	2	5.76667
BT126	M	87	2		1	T2N0M0	1			1	1	1		1	1	1	33.0667
BT127	M	67	1	2	1	TaN0M0	1	2	1				1	1	1	1	32.8667
BT128	M	82	2		1	T2N0M0	2			2	1	2		1	2	1	9.23333
BT129	F	78	2		1	T3N1M0	2			2	2	2		2	2	2	7.1
BT130	M	60	2		1	T2N0M0	1			1	1	2		1	2	1	17.1333
BT131	M	63	1	1	1	TaN0M0	1	2	2				1	1	2	1	23.5667
BT132	M	72	1	2	1	T1N0M0	1	2	2				2	1	1	1	30.7
BT133	M	68	1	2	1	T1N0M0	2	1	2				1	1	1	1	30.1
BT134	M	64	1	2	1	T1N0M0	1	2	2				2	1	1	1	29.7333
BT135	M	83	1	1	1	T1N0M0	1	1	1				1	1	2	1	15.4333
BT136	M	66	1	1	1	T1N0M0	1	1	2				1	1	1	1	29.3667
BT137	M	68	1	2	1	T1N0M0	1	1	1				1	1	2	1	17.6667
BT138	M	63	1	2	1	T1N0M0	1	1	1				1	1	1	1	28.4667
BT139	F	45	1	2	1	T1N0M0	1	2	2				2	1	1	1	23.9
BT140	M	84	1	2	1	T1N0M0	1	2	2				1	1	1	1	23.5667
BT141	M	72	1	2	1	T1N0M0	2	1	2				2	1	2	1	13.9333
BT142	F	72	2		1	TaN3M1	2			2	2	2		1	2	2	2.13333
BT143	M	66	2		1	T2N0M0	2			1	1	1		1	1	1	22.2667
BT144	M	74	2		2	T4N0M1	1			1	1	2		1	2	1	6.86667
BT145	M	63	1	1	1	T1N0M0	1	1	2				2	1	1	1	20.8333
BT146	M	58	1	2	1	T1N0M0	1	1	1				1	1	1	1	21.6333
BT147	M	70	1	1	1	TaN0M0	1	1	2				1	1	1	1	21.4
BT148	M	40	1	2	1	T1N0M0	1	1	2				1	1	1	1	57.8667
BT149	F	80	1	1	1	T1N0M0	2	2	2				1	1	1	1	21.2333
BT150	F	62	1	1	1	TaN0M0	1	2	2				1	1	1	1	21.2333
BT151	M	24	1	2	1	T1N0M0	1	1	1				1	1	1	1	20.4667
BT152	M	45	1	2	1	T1N0M0	2	1	2				1	1	1	1	20.4
BT153	F	67	1	2	1	TaN0M0	1	1	2				1	1	1	1	19
BT154	M	65	2		2	T2N0M0	2			1	1	1		2	1	1	79.3
BT155	F	59	2		2	T4N1M0	2			2	2	2		2	2	2	15.4667
BT156	M	64	2		2	T2N1M1	2			1	2	2		1	2	2	26.4333
BT157	M	70	2		2	T4N0M0	2			1	2	2		1	2	2	13.2667
BT158	M	66	2		2	T3NxM0	2			2	2	2		2	2	2	6.4
BT159	M	77	2		1	T4aN0M0	2			1	1	1		1	2	2	10.6667
BT160	M	67	2		2	T2N2M0	1			1	1	1		1	1	1	18.1333
BT161	M	51	2		2	T3aN0M0	1			1	1	1		1	1	1	15.3667
BT162	M	42	2		2	T4N2M0	2			1	2	1		1	1	1	11.8
BT163	M	72	2		1	T2N0M0	2			1	1	1		1	1	1	10.8667
BT164	F	70	2		1	T2N0M0	1			2	2	2		2	1	1	10.0333
BT165	M	54	1	1	1	T1N0M0	1	1	2				1	1	1	1	6.73333
BT166	M	62	2		1	T2aN0M0	2			1	1	1		1	1	1	5.3
